# Supplementary material for: The activation of molecular oxygen by horseradish peroxidase with sodium sulfite
Source: Royal Society of Chemistry journal article supplement (doi:10.1039/b104529f), 2001-01-01
Supplement: b104529f.doc [file b104529f.doc]

**Fig. 1** Plots of pH *vs*. rate of sulfoxidation. The reaction mixture containing HRP (5 M) and thioanisole (2 mM) was incubated with either H2O2 (0.6 mM) or sodium sulfite (0.6 mM) at 25 C. Sodium acetate buffer (50 mM, pH 5 or pH 6), sodium phosphate (50 mM, pH 7 or 8), or 2-amino-2-hydroxymethylpropane-1,3-diol (Tris) buffer (50 mM) was used for the incubation.
